# Supplementary material
Source: PubMed Central journal article supplement (PMC4351731)
Supplement: NIHMS666046-supplement-Supplemental_Material.pdf [file NIHMS666046-supplement-Supplemental_Material.pdf]

**SUPPLEMENTAL MATERIAL**

**Supplemental Table 1. Full regression results in predicting the use of ACEIs/ARBs, Beta-blockers and statins following AMI hospitalization**

|                                                                                | ACEIs/ARBs  |                    | Beta-Blockers |                    | Statins     |                    |
|--------------------------------------------------------------------------------|-------------|--------------------|---------------|--------------------|-------------|--------------------|
|                                                                                | Adjusted OR | 95% CI (p-value)   | Adjusted OR   | 95% CI (p-value)   | Adjusted OR | 95% CI (p-value)   |
| <b>Demographics</b>                                                            |             |                    |               |                    |             |                    |
| <i>Race/Gender (ref=White Men)</i>                                             |             |                    |               |                    |             |                    |
| White Women                                                                    | 0.91        | 0.88-0.94 (<0.001) | 0.93          | 0.90-0.97 (<0.001) | 0.98        | 0.95-1.02 (0.26)   |
| Black Men                                                                      | 1.06        | 0.99-1.13 (0.08)   | 0.96          | 0.90-1.03 (0.28)   | 1.04        | 0.97-1.11 (0.26)   |
| Black Women                                                                    | 0.98        | 0.89-1.07 (0.64)   | 0.85          | 0.77-0.94 (0.001)  | 1.08        | 0.98-1.18 (0.12)   |
| Hispanic Men                                                                   | 1.04        | 0.92-1.17 (0.52)   | 1.03          | 0.90-1.17 (0.07)   | 1.02        | 0.90-1.15 (0.81)   |
| Hispanic Women                                                                 | 1.20        | 1.05-1.37 (0.009)  | 1.09          | 0.94-1.27 (0.25)   | 1.04        | 0.90-1.20 (0.59)   |
| Asian Men                                                                      | 0.98        | 0.84-1.13 (0.75)   | 0.97          | 0.82-1.14 (0.70)   | 0.95        | 0.81-1.11 (0.53)   |
| Asian Women                                                                    | 1.01        | 0.87-1.17 (0.90)   | 0.94          | 0.80-1.10 (0.46)   | 1.20        | 1.02-1.41 (0.03)   |
| Other Men                                                                      | 0.98        | 0.82-1.17 (0.81)   | 0.84          | 0.70-1.02 (0.08)   | 1.04        | 0.86-1.25 (0.71)   |
| Other Women                                                                    | 1.00        | 0.81-1.24 (0.99)   | 0.90          | 0.71-1.13 (0.36)   | 1.02        | 0.82-1.27 (0.87)   |
| <i>Age (ref=Age 65-74 years)</i>                                               |             |                    |               |                    |             |                    |
| 75-84 years                                                                    | 0.96        | 0.93-1.00 (0.04)   | 0.97          | 0.93-1.01 (0.09)   | 0.95        | 0.92-0.99 (0.02)   |
| 85+ years                                                                      | 0.90        | 0.86-0.94 (<0.001) | 1.02          | 0.97-1.07 (0.54)   | 0.90        | 0.86-0.94 (<0.001) |
| <i>Annual Income (ref=&lt;\$30,000)</i>                                        |             |                    |               |                    |             |                    |
| \$30,001-60,000                                                                | 0.94        | 0.83-1.06 (0.30)   | 0.95          | 0.83-1.08 (0.42)   | 1.00        | 0.89-1.14 (0.95)   |
| \$60,001-\$100,000                                                             | 0.99        | 0.87-1.12 (0.85)   | 0.97          | 0.85-1.12 (0.67)   | 1.07        | 0.94-1.22 (0.30)   |
| \$100,001-\$150,000                                                            | 1.01        | 0.88-1.16 (0.94)   | 0.91          | 0.78-1.06 (0.24)   | 1.08        | 0.93-1.24 (0.31)   |
| >\$150,000                                                                     | 0.99        | 0.83-1.19 (0.94)   | 0.80          | 0.66-0.96 (0.02)   | 1.04        | 0.87-1.25 (0.66)   |
| <i>Geographic Region (ref='South')</i>                                         |             |                    |               |                    |             |                    |
| West                                                                           | 1.17        | 1.12-1.22 (<0.001) | 1.03          | 0.98-1.08 (0.31)   | 1.26        | 1.20-1.32 (<0.001) |
| Northeast                                                                      | 1.19        | 1.14-1.25 (<0.001) | 1.31          | 1.25-1.37 (<0.001) | 1.39        | 1.33-1.46 (<0.001) |
| Midwest                                                                        | 1.18        | 1.13-1.22 (<0.001) | 1.20          | 1.15-1.25 (<0.001) | 1.16        | 1.12-1.21 (<0.001) |
| <i>Part D "doughnut hole" (ref=no)</i>                                         |             |                    |               |                    |             |                    |
| Medicaid dual eligibility (ref=no)                                             | 0.95        | 0.91-1.00 (0.03)   | 0.89          | 0.85-0.94 (<0.001) | 0.91        | 0.86-0.95 (<0.001) |
| Dual eligibility                                                               | 1.17        | 1.13-1.21 (<0.001) | 1.05          | 1.01-1.10 (0.01)   | 1.20        | 1.15-1.24 (<0.001) |
| <b>Baseline clinical characteristics prior to index AMI admission (ref=no)</b> |             |                    |               |                    |             |                    |
| AMI                                                                            | 1.04        | 0.96-1.13 (0.31)   | 1.03          | 0.95-1.12 (0.48)   | 1.09        | 1.01-1.18 (0.03)   |
| CABG                                                                           | 1.39        | 0.72-2.69 (0.33)   | 1.49          | 0.69-3.18 (0.31)   | 1.87        | 0.92-3.81 (0.08)   |
| Stent/PTCA                                                                     | 1.37        | 0.70-2.70 (0.36)   | 1.09          | 0.48-2.30 (0.90)   | 1.37        | 0.66-2.84 (0.40)   |
| Unstable Angina                                                                | 0.89        | 0.81-0.97 (0.008)  | 0.86          | 0.79-0.95 (0.003)  | 0.86        | 0.79-0.95 (0.002)  |
| IHD                                                                            | 0.62        | 0.31-1.23 (0.17)   | 0.73          | 0.33-1.62 (0.44)   | 0.55        | 0.27-1.16 (0.12)   |
| CHF                                                                            | 0.98        | 0.89-1.07 (0.61)   | 0.82          | 0.74-0.91 (<0.001) | 1.01        | 0.91-1.11 (0.89)   |
| Atrial Fibrillation                                                            | 0.98        | 0.90-1.07 (0.68)   | 0.95          | 0.87-1.05 (0.33)   | 0.99        | 0.90-1.09 (0.84)   |
| Hypertension                                                                   | 1.05        | 1.00-1.11 (0.07)   | 0.99          | 0.94-1.05 (0.75)   | 0.97        | 0.92-1.02 (0.22)   |
| PVD                                                                            | 1.24        | 1.01-1.53 (0.04)   | 1.01          | 0.81-1.25 (0.93)   | 1.37        | 1.11-1.69 (0.003)  |
| Diabetes                                                                       | 1.13        | 1.08-1.20 (<0.001) | 1.01          | 0.95-1.06 (0.84)   | 1.03        | 0.97-1.09 (0.32)   |
| Hyperlipidemia                                                                 | 0.98        | 0.93-1.03 (0.45)   | 1.01          | 0.96-1.06 (0.76)   | 0.99        | 0.94-1.04 (0.70)   |
| CKD                                                                            | 0.84        | 0.78-0.90 (<0.001) | 1.05          | 0.98-1.13 (0.17)   | 1.14        | 1.07-1.22 (<0.001) |
| ESRD                                                                           | 0.76        | 0.69-0.82 (<0.001) | 0.84          | 0.76-0.92 (<0.001) | 0.81        | 0.75-0.89 (<0.001) |
| COPD                                                                           | 1.09        | 0.98-1.21 (0.11)   | 1.08          | 0.97-1.20 (0.17)   | 1.10        | 0.99-1.22 (0.09)   |
| Asthma                                                                         | 1.02        | 0.93-1.12 (0.68)   | 0.80          | 0.73-0.87 (<0.001) | 1.02        | 0.93-1.11 (0.71)   |
| Liver Disease                                                                  | 0.86        | 0.71-1.05 (0.14)   | 1.03          | 0.83-1.26 (0.82)   | 0.81        | 0.66-0.98 (0.03)   |
| Osteoporosis                                                                   | 0.97        | 0.88-1.06 (0.50)   | 1.02          | 0.92-1.12 (0.75)   | 0.96        | 0.87-1.06 (0.40)   |
| <i>CCI (ref=0)</i>                                                             |             |                    |               |                    |             |                    |
| 1-2                                                                            | 0.77        | 0.72-0.82 (<0.001) | 0.77          | 0.72-0.83 (<0.001) | 0.79        | 0.73-0.84 (<0.001) |

|                                                                      |      |                    |      |                    |      |                    |
|----------------------------------------------------------------------|------|--------------------|------|--------------------|------|--------------------|
| 3-5                                                                  | 0.70 | 0.64-0.76 (<0.001) | 0.74 | 0.68-0.79 (<0.001) | 0.66 | 0.61-0.72 (<0.001) |
| 6-8                                                                  | 0.61 | 0.54-0.69 (<0.001) | 0.69 | 0.61-0.79 (<0.001) | 0.65 | 0.57-0.74 (<0.001) |
| 9+                                                                   | 0.58 | 0.49-0.68 (<0.001) | 0.72 | 0.60-0.85 (<0.001) | 0.59 | 0.50-0.70 (<0.001) |
| Angioedema and Hyperkalemia                                          | 0.77 | 0.71-0.83 (<0.001) | 1.01 | 0.93-1.10 (0.81)   | 0.99 | 0.92-1.07 (0.77)   |
| Hypotension                                                          | 0.79 | 0.74-0.84 (<0.001) | 0.81 | 0.75-0.87 (<0.001) | 0.88 | 0.82-0.94 (<0.001) |
| Sinus Bradycardia & Heart Block                                      | 0.95 | 0.91-1.00 (0.03)   | 0.88 | 0.84-0.92 (<0.001) | 0.92 | 0.88-0.96 (<0.001) |
| Rhabdomyolysis                                                       | 0.82 | 0.67-1.02 (0.07)   | 0.94 | 0.75-1.17 (0.57)   | 0.79 | 0.64-0.98 (0.03)   |
| Cerebrovascular disease                                              | 1.08 | 0.99-1.18 (0.10)   | 1.08 | 0.98-1.18 (0.12)   | 1.02 | 0.93-1.11 (0.75)   |
| <b>Baseline medication use prior to index AMI admission (ref=no)</b> |      |                    |      |                    |      |                    |
| Beta-blockers                                                        | 0.99 | 0.96-1.02 (0.53)   | 2.32 | 2.24-2.41 (<0.001) | 0.87 | 0.84-0.90 (<0.001) |
| ACEIs/ARBs                                                           | 4.42 | 4.28-4.56 (<0.001) | 1.10 | 1.07-1.14 (<0.001) | 1.03 | 1.00-1.07 (0.04)   |
| Statins                                                              | 1.01 | 0.98-1.05 (0.41)   | 1.03 | 1.00-1.07 (0.07)   | 4.22 | 4.07-4.37 (<0.001) |
| <b>Characteristics of index inpatient hospital stay (ref=no)</b>     |      |                    |      |                    |      |                    |
| NSTEMI                                                               | 0.80 | 0.78-0.83 (<0.001) | 0.84 | 0.81-0.88 (<0.001) | 0.85 | 0.82-0.90 (<0.001) |
| CHF                                                                  | 1.20 | 1.16-1.24 (<0.001) | 1.08 | 1.04-1.12 (<0.001) | 0.93 | 0.90-0.97 (<0.001) |
| Cardiogenic Shock                                                    | 1.29 | 1.16-1.43 (<0.001) | 1.09 | 0.97-1.23 (0.14)   | 1.13 | 1.01-1.26 (0.03)   |
| Acute Renal Failure                                                  | 0.61 | 0.58-0.64 (<0.001) | 1.02 | 0.97-1.07 (0.53)   | 0.96 | 0.91-1.00 (0.06)   |
| Hypotension                                                          | 0.83 | 0.78-0.89 (<0.001) | 0.89 | 0.82-0.95 (0.001)  | 1.02 | 0.95-1.09 (0.61)   |
| Cardiac Dysrhythmias                                                 | 0.99 | 0.96-1.02 (0.41)   | 0.91 | 0.88-0.95 (<0.001) | 0.93 | 0.90-0.97 (<0.001) |
| CABG                                                                 | 0.87 | 0.81-0.93 (<0.001) | 2.08 | 1.90-2.26 (<0.001) | 2.31 | 2.14-2.50 (<0.001) |
| Stent/PTCA                                                           | 1.27 | 1.22-1.32 (<0.001) | 1.46 | 1.39-1.53 (<0.001) | 1.85 | 1.77-1.93 (<0.001) |
| Cardiac Catheterization                                              | 1.20 | 1.13-1.27 (<0.001) | 1.11 | 1.04-1.19 (0.004)  | 1.21 | 1.13-1.29 (<0.001) |
| Angiocardiology                                                      | 1.06 | 1.00-1.12 (0.06)   | 1.12 | 1.05-1.20 (0.001)  | 1.21 | 1.14-1.29 (<0.001) |
| Thrombolytic use for AMI                                             | 1.26 | 1.03-1.55 (0.02)   | 1.04 | 0.83-1.31 (0.72)   | 1.03 | 0.84-1.28 (0.76)   |
| Anti-platelet use for AMI                                            | 1.06 | 0.98-1.14 (0.17)   | 1.16 | 1.06-1.27 (0.002)  | 1.26 | 1.16-1.37 (<0.001) |
| <i>ICU Stay Length (ref=0 days)</i>                                  |      |                    |      |                    |      |                    |
| 1-3 days                                                             | 1.05 | 1.01-1.09 (0.006)  | 1.05 | 1.01-1.10 (0.009)  | 1.06 | 1.02-1.09 (0.004)  |
| 4-10 days                                                            | 1.08 | 1.04-1.13 (<0.001) | 1.09 | 1.04-1.14 (<0.001) | 1.03 | 0.99-1.08 (0.17)   |
| 11+ days                                                             | 1.07 | 0.97-1.18 (0.16)   | 0.97 | 0.87-1.08 (0.60)   | 1.00 | 0.90-1.10 (0.92)   |
| <i>Index Stay Length (ref=1 day)</i>                                 |      |                    |      |                    |      |                    |
| 2-5 days                                                             | 1.09 | 1.04-1.13 (<0.001) | 1.12 | 1.06-1.17 (<0.001) | 1.11 | 1.07-1.16 (<0.001) |
| 6-10 days                                                            | 1.05 | 1.01-1.10 (0.02)   | 1.09 | 1.03-1.14 (<0.001) | 1.01 | 0.97-1.06 (0.65)   |
| 11+ days                                                             | 0.94 | 0.88-1.01 (0.08)   | 1.02 | 0.94-1.10 (0.68)   | 0.93 | 0.86-0.99 (0.03)   |
| <i>Discharge location (ref='Home')</i>                               |      |                    |      |                    |      |                    |
| SNF or other care setting                                            | 0.76 | 0.73-0.79 (<0.001) | 0.67 | 0.65-0.70 (<0.001) | 0.70 | 0.67-0.73 (<0.001) |

*Abbreviations:* OR, Odds Ratio; AMI, Acute Myocardial Infarction; ACEIs, Angiotensin Converting Enzyme Inhibitor; ARB, Angiotensin Receptor Blocker; CABG, Coronary Artery Bypass Graft; PTCA, Percutaneous Transluminal Coronary Angioplasty; IHD, Ischemic Heart Disease; PVD, Peripheral Vascular Disease; CKD, Chronic Kidney Disease; ESRD, End-stage Renal Disease; COPD, Chronic Obstructive Pulmonary Disorder; CCI, Charlson Comorbidity Index; ICU, Intensive Care Unit; SNF, Skilled Nursing Facility

**Supplemental Table 2. Use of ACEIs/ARBs, beta-blockers and statins within 30 days post-AMI hospitalization by the index AMI primary versus secondary discharge diagnosis position**

| <i>Race/Ethnic and Gender groups</i>        | ACEIs/ARBs   |                          |                    | Beta-blockers |                          |                    | Statins      |                          |                  |
|---------------------------------------------|--------------|--------------------------|--------------------|---------------|--------------------------|--------------------|--------------|--------------------------|------------------|
|                                             | No. of users | Adjusted OR <sup>†</sup> | 95% CI (p-value)   | No. of users  | Adjusted OR <sup>†</sup> | 95% CI (p-value)   | No. of users | Adjusted OR <sup>†</sup> | 95% CI (p-value) |
| <b>Primary Diagnosis Field (N=68,174)</b>   |              |                          |                    |               |                          |                    |              |                          |                  |
| White Men                                   | 18,762       | Ref                      | -                  | 25,372        | Ref                      | -                  | 20,187       | Ref                      | -                |
| White Women                                 | 14,008       | 0.90                     | 0.97-0.94 (<0.001) | 20,062        | 0.91                     | 0.87-0.95 (<0.001) | 16,984       | 0.97                     | 0.93-1.01 (0.12) |
| Black Men                                   | 2,354        | 1.07                     | 0.99-1.15 (0.09)   | 4,008         | 0.92                     | 0.84-0.99 (0.03)   | 2,425        | 1.02                     | 0.94-1.10 (0.68) |
| Black Women                                 | 1,068        | 0.98                     | 0.88-1.08 (0.67)   | 1,437         | 0.83                     | 0.74-0.92 (<0.001) | 1,228        | 1.05                     | 0.94-1.16 (0.39) |
| Hispanic Men                                | 686          | 1.09                     | 0.95-1.25 (0.23)   | 853           | 1.06                     | 0.91-1.24 (0.45)   | 710          | 1.06                     | 0.92-1.22 (0.42) |
| Hispanic Women                              | 559          | 1.23                     | 1.06-1.42 (0.007)  | 714           | 1.05                     | 0.89-1.24 (0.60)   | 604          | 1.02                     | 0.88-1.19 (0.80) |
| Asian Men                                   | 411          | 0.97                     | 0.82-1.15 (0.72)   | 517           | 0.97                     | 0.80-1.17 (0.74)   | 445          | 0.95                     | 0.79-1.14 (0.56) |
| Asian Women                                 | 402          | 1.01                     | 0.86-1.20 (0.88)   | 526           | 0.89                     | 0.74-1.08 (0.25)   | 505          | 1.25                     | 1.04-1.51 (0.02) |
| Other Men                                   | 274          | 0.98                     | 0.80-1.20 (0.84)   | 352           | 0.83                     | 0.67-1.03 (0.08)   | 308          | 1.05                     | 0.85-1.29 (0.67) |
| Other Women                                 | 202          | 0.96                     | 0.77-1.21 (0.75)   | 270           | 0.83                     | 0.64-1.08 (0.16)   | 242          | 1.01                     | 0.79-1.29 (0.91) |
| <b>Secondary Diagnosis Field (N=16,843)</b> |              |                          |                    |               |                          |                    |              |                          |                  |
| White Men                                   | 4,422        | Ref                      | -                  | 6,104         | Ref                      | -                  | 4,248        | Ref                      | -                |
| White Women                                 | 2,628        | 0.92                     | 0.85-0.99 (0.03)   | 3,916         | 0.98                     | 0.91-1.07 (0.67)   | 2,945        | 1.01                     | 0.93-1.09 (0.80) |
| Black Men                                   | 548          | 1.02                     | 0.88-1.18 (0.80)   | 754           | 1.12                     | 0.96-1.31 (0.14)   | 536          | 1.12                     | 0.96-1.29 (0.15) |
| Black Women                                 | 233          | 0.97                     | 0.79-1.20 (0.80)   | 331           | 0.92                     | 0.74-1.13 (0.40)   | 253          | 1.22                     | 0.99-1.50 (0.06) |
| Hispanic Men                                | 160          | 0.87                     | 0.67-1.13 (0.29)   | 201           | 0.94                     | 0.72-1.23 (0.66)   | 148          | 0.87                     | 0.67-1.13 (0.28) |
| Hispanic Women                              | 86           | 1.02                     | 0.72-1.44 (0.92)   | 126           | 1.25                     | 0.87-1.81 (0.23)   | 91           | 1.06                     | 0.75-1.51 (0.73) |
| Asian Men                                   | 120          | 1.00                     | 0.74-1.36 (0.99)   | 153           | 0.96                     | 0.70-1.33 (0.82)   | 118          | 1.00                     | 0.73-1.38 (0.98) |
| Asian Women                                 | 108          | 0.98                     | 0.71-1.36 (0.90)   | 141           | 1.09                     | 0.78-1.54 (0.61)   | 117          | 1.06                     | 0.75-1.48 (0.75) |
| Other Men                                   | 57           | 0.94                     | 0.61-1.46 (0.79)   | 70            | 0.89                     | 0.57-1.38 (0.60)   | 56           | 0.95                     | 0.60-1.49 (0.82) |
| Other Women                                 | 36           | 1.21                     | 0.71-2.06 (0.49)   | 48            | 1.34                     | 0.76-2.37 (0.31)   | 35           | 1.03                     | 0.60-1.76 (0.93) |

<sup>†</sup> Adjusted for all the measured demographic, clinical and baseline characteristics listed in Table 1

Abbreviations: OR, Odds Ratio; AMI, Acute Myocardial Infarction; ACEIs, Angiotensin Converting Enzyme Inhibitor; ARB, Angiotensin Receptor Blocker

**Supplemental Table 3. Mean medication adherence to ACEIs/ARBs, beta-blockers and statins post-AMI hospitalization by race/ethnicity and gender**

| <b>Race/Ethnic and Gender groups</b> | <b>No. of ACEI/ARB users<br/>(N = 47,124)</b> | <b>ACEIs/ARBs,<br/>mean±SD (median)<br/>adherence*</b> | <b>No. of beta-blocker users<br/>(N = 64,939)</b> | <b>Beta-Blockers,<br/>mean±SD (median)<br/>adherence*</b> | <b>No. of statin users<br/>(N = 52,185)</b> | <b>Statins,<br/>mean±SD (median)<br/>adherence*</b> |
|--------------------------------------|-----------------------------------------------|--------------------------------------------------------|---------------------------------------------------|-----------------------------------------------------------|---------------------------------------------|-----------------------------------------------------|
| White Men                            | 23,184                                        | 0.78±0.28 (0.92)                                       | 31,476                                            | 0.82±0.24 (0.93)                                          | 24,435                                      | 0.80±0.26 (0.92)                                    |
| White Women                          | 16,636                                        | 0.76±0.29 (0.91)                                       | 23,978                                            | 0.80±0.25 (0.92)                                          | 19,929                                      | 0.81±0.25 (0.93)                                    |
| Black Men                            | 2,902                                         | 0.78±0.26 (0.88)                                       | 3,746                                             | 0.78±0.25 (0.87)                                          | 2,961                                       | 0.76±0.26 (0.87)                                    |
| Black Women                          | 1,301                                         | 0.73±0.27 (0.83)                                       | 1,768                                             | 0.75±0.27 (0.85)                                          | 1,481                                       | 0.75±0.26 (0.86)                                    |
| Hispanic Men                         | 846                                           | 0.80±0.25 (0.92)                                       | 1,054                                             | 0.79±0.25 (0.89)                                          | 858                                         | 0.77±0.27 (0.88)                                    |
| Hispanic Women                       | 381                                           | 0.77±0.26 (0.88)                                       | 491                                               | 0.76±0.26 (0.86)                                          | 411                                         | 0.76±0.27 (0.86)                                    |
| Asian Men                            | 355                                           | 0.81±0.26 (0.95)                                       | 460                                               | 0.81±0.26 (0.93)                                          | 407                                         | 0.83±0.24 (0.95)                                    |
| Asian Women                          | 316                                           | 0.77±0.28 (0.91)                                       | 418                                               | 0.78±0.26 (0.89)                                          | 420                                         | 0.81±0.24 (0.92)                                    |
| Other Men                            | 222                                           | 0.80±0.26 (0.92)                                       | 272                                               | 0.80±0.24 (0.91)                                          | 252                                         | 0.82±0.22 (0.91)                                    |
| Other Women                          | 143                                           | 0.74±0.31 (0.90)                                       | 193                                               | 0.77±0.28 (0.90)                                          | 167                                         | 0.77±0.27 (0.89)                                    |

\*Mean adherence defined as the mean proportion of days covered by the prescription supply across patients in each group in the 12 months following AMI discharge  
*Abbreviations:* AMI, Acute Myocardial Infarction; ACEI, Angiotensin Converting Enzyme Inhibitor; SD, Standard Deviation, ARB, Angiotensin Receptor Blocker

**Supplemental Table 4. Full regression results in predicting patient adherence to ACEIs/ARBs, Beta-blockers and statins following AMI hospitalization**

|                                                                                | ACEIs/ARBs  |                    | Beta-Blockers |                    | Statins     |                    |
|--------------------------------------------------------------------------------|-------------|--------------------|---------------|--------------------|-------------|--------------------|
|                                                                                | Adjusted OR | 95% CI (p-value)   | Adjusted OR   | 95% CI (p-value)   | Adjusted OR | 95% CI (p-value)   |
| <b>Demographics</b>                                                            |             |                    |               |                    |             |                    |
| <i>Race/Gender (ref=White Men)</i>                                             |             |                    |               |                    |             |                    |
| White Women                                                                    | 0.91        | 0.87-0.95 (<0.001) | 0.90          | 0.86-0.93 (<0.001) | 1.05        | 1.01-1.09 (0.03)   |
| Black Men                                                                      | 0.88        | 0.81-0.96 (0.004)  | 0.74          | 0.69-0.79 (<0.001) | 0.73        | 0.67-0.79 (<0.001) |
| Black Women                                                                    | 0.70        | 0.62-0.78 (<0.001) | 0.64          | 0.58-0.71 (<0.001) | 0.72        | 0.65-0.81 (<0.001) |
| Hispanic Men                                                                   | 0.95        | 0.82-1.11 (0.53)   | 0.81          | 0.71-0.92 (0.002)  | 0.77        | 0.66-0.89 (<0.001) |
| Hispanic Women                                                                 | 0.85        | 0.72-1.00 (0.05)   | 0.70          | 0.60-0.80 (<0.001) | 0.71        | 0.61-0.83 (<0.001) |
| Asian Men                                                                      | 1.06        | 0.88-1.28 (0.53)   | 1.06          | 0.89-1.26 (0.50)   | 1.15        | 0.95-1.40 (0.14)   |
| Asian Women                                                                    | 0.92        | 0.77-1.11 (0.39)   | 0.83          | 0.70-0.97 (0.02)   | 0.95        | 0.80-1.13 (0.58)   |
| Other Men                                                                      | 1.10        | 0.87-1.39 (0.42)   | 0.86          | 0.70-1.06 (0.16)   | 1.08        | 0.86-1.36 (0.53)   |
| Other Women                                                                    | 0.85        | 0.65-1.11 (0.24)   | 0.76          | 0.60-0.95 (0.018)  | 0.74        | 0.58-0.95 (0.02)   |
| <i>Age (ref=Age 65-74 years)</i>                                               |             |                    |               |                    |             |                    |
| 75-84 years                                                                    | 1.02        | 0.97-1.07 (0.45)   | 1.01          | 0.97-1.05 (0.53)   | 1.06        | 1.01-1.10 (0.02)   |
| 85+ years                                                                      | 1.03        | 0.97-1.09 (0.37)   | 1.06          | 1.01-1.12 (0.02)   | 1.18        | 1.12-1.25 (<0.001) |
| <i>Annual Income (ref=&lt;\$30,000)</i>                                        |             |                    |               |                    |             |                    |
| \$30,001-60,000                                                                | 0.96        | 0.82-1.13 (0.64)   | 0.90          | 0.79-1.05 (0.14)   | 1.01        | 0.87-1.18 (0.92)   |
| \$60,001-\$100,000                                                             | 1.00        | 0.86-1.18 (0.96)   | 0.90          | 0.78-1.04 (0.14)   | 1.07        | 0.91-1.25 (0.43)   |
| \$100,001-\$150,000                                                            | 0.96        | 0.81-1.15 (0.67)   | 0.91          | 0.78-1.07 (0.25)   | 1.07        | 0.90-1.27 (0.46)   |
| >\$150,000                                                                     | 1.19        | 0.94-1.50 (0.14)   | 0.94          | 0.77-1.15 (0.53)   | 1.16        | 0.93-1.45 (<0.001) |
| <i>Geographic Region (ref='South')</i>                                         |             |                    |               |                    |             |                    |
| West                                                                           | 1.02        | 0.96-1.08 (0.50)   | 0.96          | 0.92-1.01 (0.16)   | 1.07        | 1.01-1.13 (0.02)   |
| Northeast                                                                      | 1.19        | 1.13-1.26 (<0.001) | 1.26          | 1.20-1.32 (<0.001) | 1.25        | 1.18-1.32 (<0.001) |
| Midwest                                                                        | 1.13        | 1.08-1.19 (<0.001) | 1.17          | 1.12-1.22 (<0.001) | 1.17        | 1.12-1.23 (<0.001) |
| <i>Part D "doughnut hole" (ref=no)</i>                                         |             |                    |               |                    |             |                    |
| Dual eligibility                                                               | 1.08        | 1.01-1.14 (0.02)   | 1.10          | 1.04-1.16 (0.001)  | 1.23        | 1.15-1.30 (<0.001) |
| <i>Medicaid dual eligibility (ref=no)</i>                                      |             |                    |               |                    |             |                    |
| Dual eligibility                                                               | 1.10        | 1.05-1.15 (<0.001) | 1.01          | 0.97-1.05 (0.68)   | 1.10        | 1.05-1.14 (<0.001) |
| <b>Baseline clinical characteristics prior to index AMI admission (ref=no)</b> |             |                    |               |                    |             |                    |
| AMI                                                                            | 1.07        | 0.97-1.19 (0.18)   | 1.00          | 0.91-1.10 (0.98)   | 0.98        | 0.89-1.09 (0.76)   |
| CABG                                                                           | 1.45        | 0.65-3.22 (0.37)   | 0.69          | 0.35-1.36 (0.28)   | 1.82        | 0.83-3.98 (0.13)   |
| Stent/PTCA                                                                     | 1.38        | 0.61-3.15 (0.44)   | 0.54          | 0.26-1.09 (0.08)   | 1.34        | 0.60-3.00 (0.48)   |
| Unstable Angina                                                                | 0.94        | 0.84-1.06 (0.30)   | 0.90          | 0.81-0.99 (0.04)   | 0.95        | 0.85-1.07 (0.38)   |
| IHD                                                                            | 0.66        | 0.29-1.52 (0.33)   | 1.66          | 0.81-3.40 (0.17)   | 0.66        | 0.29-1.48 (0.31)   |
| CHF                                                                            | 0.91        | 0.80-1.04 (0.15)   | 1.11          | 0.99-1.24 (0.07)   | 1.01        | 0.89-1.14 (0.92)   |
| Atrial Fibrillation                                                            | 0.98        | 0.87-1.11 (0.75)   | 0.95          | 0.86-1.06 (0.37)   | 0.98        | 0.87-1.11 (0.80)   |
| Hypertension                                                                   | 1.00        | 0.93-1.07 (0.89)   | 1.04          | 0.97-1.10 (0.26)   | 0.93        | 0.87-1.00 (0.04)   |
| PVD                                                                            | 0.93        | 0.70-1.24 (0.63)   | 1.12          | 0.89-1.41 (0.35)   | 1.23        | 0.92-1.64 (0.17)   |
| Diabetes                                                                       | 1.06        | 0.98-1.14 (0.13)   | 0.95          | 0.90-1.01 (0.13)   | 1.03        | 0.96-1.10 (0.48)   |
| Hyperlipidemia                                                                 | 0.95        | 0.89-1.02 (0.17)   | 0.94          | 0.89-1.00 (0.04)   | 1.01        | 0.94-1.08 (0.81)   |
| CKD                                                                            | 0.95        | 0.87-1.05 (0.30)   | 1.16          | 1.07-1.25 (<0.001) | 1.08        | 0.98-1.18 (0.12)   |
| ESRD                                                                           | 0.73        | 0.64-0.82 (<0.001) | 0.68          | 0.62-0.75 (<0.001) | 0.97        | 0.87-1.08 (0.57)   |
| COPD                                                                           | 1.00        | 0.87-1.15 (1.00)   | 1.01          | 0.89-1.14 (0.86)   | 0.88        | 0.76-1.02 (0.09)   |
| Asthma                                                                         | 1.02        | 0.90-1.15 (0.76)   | 0.95          | 0.85-1.06 (0.35)   | 0.96        | 0.85-1.08 (0.50)   |
| Liver Disease                                                                  | 1.04        | 0.79-1.38 (0.77)   | 0.90          | 0.72-1.13 (0.36)   | 0.78        | 0.59-1.04 (0.09)   |
| Osteoporosis                                                                   | 0.95        | 0.84-1.08 (0.42)   | 0.89          | 0.80-0.99 (0.03)   | 0.87        | 0.76-0.99 (0.03)   |
| <i>CCI (ref=0)</i>                                                             |             |                    |               |                    |             |                    |
| 1-2                                                                            | 0.84        | 0.76-0.92 (<0.001) | 0.90          | 0.83-0.97 (0.005)  | 0.95        | 0.87-1.03 (0.22)   |
| 3-5                                                                            | 0.84        | 0.74-0.94 (0.003)  | 0.85          | 0.77-0.94 (0.001)  | 0.94        | 0.84-1.06 (0.33)   |
| 6-8                                                                            | 0.80        | 0.67-0.95 (0.009)  | 0.80          | 0.70-0.93 (0.003)  | 0.93        | 0.79-1.10 (0.40)   |
| 9+                                                                             | 0.81        | 0.64-1.02 (0.07)   | 0.78          | 0.64-0.94 (0.01)   | 1.03        | 0.82-1.30 (0.80)   |

|                                                                      |      |                    |      |                    |      |                    |
|----------------------------------------------------------------------|------|--------------------|------|--------------------|------|--------------------|
| Angioedema and Hyperkalemia                                          | 0.91 | 0.82-1.01 (0.08)   | 1.07 | 0.98-1.17 (0.12)   | 0.98 | 0.88-1.08 (0.64)   |
| Hypotension                                                          | 0.88 | 0.80-0.96 (0.005)  | 0.94 | 0.87-1.02 (0.12)   | 0.99 | 0.91-1.09 (0.87)   |
| Sinus Bradycardia & Heart Block                                      | 1.00 | 0.95-1.06 (0.99)   | 0.96 | 0.91-1.01 (0.10)   | 0.96 | 0.90-1.01 (0.13)   |
| Rhabdomyolysis                                                       | 0.85 | 0.63-1.14 (0.27)   | 0.83 | 0.65-1.06 (0.13)   | 0.93 | 0.69-1.25 (0.61)   |
| Cerebrovascular disease                                              | 1.11 | 0.98-1.24 (0.09)   | 0.98 | 0.89-1.09 (0.73)   | 0.99 | 0.88-1.11 (0.82)   |
| <b>Baseline medication use prior to index AMI admission (ref=no)</b> |      |                    |      |                    |      |                    |
| Beta-blockers                                                        | 1.15 | 1.11-1.20 (<0.001) | 1.55 | 1.49-1.60 (<0.001) | 1.09 | 1.05-1.13 (<0.001) |
| ACEIs/ARBs                                                           | 1.71 | 1.64-1.79 (<0.001) | 1.19 | 1.15-1.23 (<0.001) | 1.08 | 1.04-1.12 (<0.001) |
| Statins                                                              | 1.11 | 1.06-1.15 (<0.001) | 1.14 | 1.10-1.18 (<0.001) | 1.79 | 1.71-1.86 (<0.001) |
| <b>Characteristics of index inpatient hospital stay (ref=no)</b>     |      |                    |      |                    |      |                    |
| NSTEMI                                                               | 0.95 | 0.91-1.00 (0.03)   | 0.90 | 0.87-0.94 (<0.001) | 0.93 | 0.89-0.97 (0.002)  |
| CHF                                                                  | 0.96 | 0.92-1.00 (0.08)   | 1.06 | 1.02-1.10 (0.003)  | 1.00 | 0.96-1.05 (0.87)   |
| Cardiogenic Shock                                                    | 0.94 | 0.83-1.07 (0.36)   | 1.15 | 1.02-1.28 (0.02)   | 1.14 | 1.01-1.29 (0.04)   |
| Acute Renal Failure                                                  | 0.83 | 0.78-0.88 (<0.001) | 1.01 | 0.95-1.06 (0.83)   | 0.96 | 0.91-1.02 (0.20)   |
| Hypotension                                                          | 0.87 | 0.80-0.95 (0.002)  | 0.92 | 0.85-0.99 (0.03)   | 1.05 | 0.97-1.14 (0.25)   |
| Cardiac Dysrhythmias                                                 | 1.02 | 0.98-1.06 (0.36)   | 1.03 | 0.99-1.07 (0.16)   | 1.02 | 0.98-1.07 (0.32)   |
| CABG                                                                 | 1.09 | 0.99-1.19 (0.07)   | 1.05 | 0.98-1.13 (0.20)   | 1.25 | 1.15-1.36 (<0.001) |
| Stent/PTCA                                                           | 1.09 | 1.04-1.15 (0.001)  | 1.10 | 1.05-1.15 (<0.001) | 1.15 | 1.10-1.21 (<0.001) |
| Cardiac Catheterization                                              | 1.02 | 0.95-1.10 (0.53)   | 1.08 | 1.01-1.15 (0.03)   | 1.05 | 0.98-1.13 (0.14)   |
| Angiocardiology                                                      | 0.97 | 0.90-1.04 (0.34)   | 0.98 | 0.92-1.04 (0.44)   | 0.97 | 0.90-1.03 (0.32)   |
| Thrombolytic use for AMI                                             | 1.12 | 0.87-1.44 (0.37)   | 1.04 | 0.83-1.30 (0.71)   | 0.95 | 0.74-1.20 (0.64)   |
| Anti-platelet use for AMI                                            | 0.98 | 0.90-1.08 (0.74)   | 1.08 | 1.00-1.17 (0.06)   | 0.97 | 0.89-1.05 (0.45)   |
| <i>ICU Stay Length (ref=0 days)</i>                                  |      |                    |      |                    |      |                    |
| 1-3 days                                                             | 0.99 | 0.95-1.04 (0.66)   | 0.99 | 0.95-1.03 (0.51)   | 0.99 | 0.95-1.03 (0.66)   |
| 4-10 days                                                            | 0.97 | 0.92-1.03 (0.30)   | 0.94 | 0.90-0.98 (0.007)  | 0.97 | 0.92-1.03 (0.31)   |
| 11+ days                                                             | 1.01 | 0.89-1.16 (0.85)   | 1.07 | 0.96-1.20 (0.23)   | 1.07 | 0.94-1.21 (0.33)   |
| <i>Index Stay Length (ref=1 day)</i>                                 |      |                    |      |                    |      |                    |
| 2-5 days                                                             | 1.05 | 0.99-1.11 (0.09)   | 1.01 | 0.96-1.06 (0.80)   | 1.05 | 0.99-1.11 (0.09)   |
| 6-10 days                                                            | 0.91 | 0.86-0.96 (0.001)  | 1.00 | 0.95-1.05 (0.94)   | 1.02 | 0.96-1.08 (0.56)   |
| 11+ days                                                             | 0.89 | 0.81-0.98 (0.01)   | 0.96 | 0.89-1.04 (0.37)   | 1.01 | 0.93-1.11 (0.76)   |
| <i>Discharge location (ref='Home')</i>                               |      |                    |      |                    |      |                    |
| SNF or other care setting                                            | 1.06 | 1.00-1.11 (0.05)   | 1.13 | 1.08-1.18 (<0.001) | 1.07 | 1.01-1.13 (0.02)   |

*Abbreviations:* OR, Odds Ratio; AMI, Acute Myocardial Infarction; ACEIs, Angiotensin Converting Enzyme Inhibitor; ARB, Angiotensin Receptor Blocker; CABG, Coronary Artery Bypass Graft; PTCA, Percutaneous Transluminal Coronary Angioplasty; IHD, Ischemic Heart Disease; PVD, Peripheral Vascular Disease; CKD, Chronic Kidney Disease; ESRD, End-stage Renal Disease; COPD, Chronic Obstructive Pulmonary Disorder; CCI, Charlson Comorbidity Index; ICU, Intensive Care Unit; SNF, Skilled Nursing Facility

**Supplemental Table 5. Respective effects of follow-up with cardiologist or primary care, and total out-of-pocket medication cost for the post-AMI preventive therapies on gender and racial/ethnic gaps in medication adherence**

| Testing Variable                                                                         | Race/Ethnicity and Gender<br>(ref= 'White Man') | ACEI/ARBs                                        |                                          | Beta-Blockers                      |                                         | Statins                                          |                                                       |
|------------------------------------------------------------------------------------------|-------------------------------------------------|--------------------------------------------------|------------------------------------------|------------------------------------|-----------------------------------------|--------------------------------------------------|-------------------------------------------------------|
|                                                                                          |                                                 | Model 1 <sup>§</sup><br>OR <sup>§</sup> , 95% CI | Model 1 + Testing Variable<br>OR, 95% CI | Model 1 <sup>§</sup><br>OR, 95% CI | Model 1 + Testing Variable<br>OR 95% CI | Model 1 <sup>§</sup><br>OR <sup>§</sup> , 95% CI | Model 1 <sup>§</sup> + Testing Variable<br>OR, 95% CI |
| <i>Cardiologist visit within 30 days post discharge</i>                                  | White Women                                     | 0.91, 0.87-0.95                                  | 0.91, 0.87-0.95                          | 0.90, 0.86-0.93                    | 0.90, 0.86-0.93                         | 1.05, 1.01-1.09                                  | 1.05, 1.01-1.09                                       |
|                                                                                          | Black Men                                       | 0.88, 0.81-0.96                                  | 0.88, 0.81-0.96                          | 0.74, 0.69-0.79                    | 0.74, 0.69-0.80                         | 0.73, 0.67-0.79                                  | 0.73, 0.67-0.79                                       |
|                                                                                          | Black Women                                     | 0.70, 0.62-0.78                                  | 0.70, 0.62-0.78                          | 0.64, 0.58-0.71                    | 0.64, 0.58-0.71                         | 0.72, 0.65-0.81                                  | 0.72, 0.65-0.81                                       |
|                                                                                          | Hispanic Men                                    | 0.95, 0.82-1.11                                  | 0.95, 0.82-1.11                          | 0.81, 0.71-0.92                    | 0.81, 0.71-0.92                         | 0.77, 0.66-0.89                                  | 0.77, 0.66-0.88                                       |
|                                                                                          | Hispanic Women                                  | 0.85, 0.72-1.00                                  | 0.85, 0.72-1.00                          | 0.70, 0.60-0.80                    | 0.70, 0.60-0.80                         | 0.71, 0.61-0.83                                  | 0.71, 0.61-0.83                                       |
|                                                                                          | Asian Men                                       | 1.06, 0.88-1.28                                  | 1.06, 0.88-1.28                          | 1.06, 0.89-1.26                    | 1.06, 0.89-1.25                         | 1.15, 0.95-1.40                                  | 1.15, 0.95-1.40                                       |
|                                                                                          | Asian Women                                     | 0.92, 0.77-1.11                                  | 0.82, 0.77-1.11                          | 0.83, 0.70-0.97                    | 0.82, 0.70-0.97                         | 0.95, 0.80-1.13                                  | 0.95, 0.80-1.13                                       |
|                                                                                          | Other Men                                       | 1.10, 0.87-1.39                                  | 1.10, 0.87-1.39                          | 0.86, 0.70-1.06                    | 0.87, 0.71-1.06                         | 1.08, 0.86-1.36                                  | 1.08, 0.86-1.36                                       |
| <i>PCPs visit within 30 days post discharge</i>                                          | Other Women                                     | 0.85, 0.65-1.11                                  | 0.85, 0.65-1.11                          | 0.76, 0.60-0.95                    | 0.76, 0.60-0.96                         | 0.74, 0.58-0.95                                  | 0.75, 0.58-0.96                                       |
|                                                                                          | White Women                                     | 0.91, 0.87-0.95                                  | 0.90, 0.86-0.94                          | 0.90, 0.86-0.93                    | 0.89, 0.85-0.92                         | 1.05, 1.01-1.09                                  | 1.04, 1.00-1.09                                       |
|                                                                                          | Black Men                                       | 0.88, 0.81-0.96                                  | 0.86, 0.79-0.94                          | 0.74, 0.69-0.79                    | 0.72, 0.67-0.77                         | 0.73, 0.67-0.79                                  | 0.70, 0.65-0.76                                       |
|                                                                                          | Black Women                                     | 0.70, 0.62-0.78                                  | 0.68, 0.61-0.77                          | 0.64, 0.58-0.71                    | 0.62, 0.56-0.69                         | 0.72, 0.65-0.81                                  | 0.71, 0.63-0.79                                       |
|                                                                                          | Hispanic Men                                    | 0.95, 0.82-1.11                                  | 0.92, 0.79-1.11                          | 0.81, 0.71-0.92                    | 0.76, 0.67-0.87                         | 0.77, 0.66-0.89                                  | 0.74, 0.65-0.86                                       |
|                                                                                          | Hispanic Women                                  | 0.85, 0.72-1.00                                  | 0.82, 0.70-0.96                          | 0.70, 0.60-0.80                    | 0.66, 0.57-0.76                         | 0.71, 0.61-0.83                                  | 0.69, 0.59-0.81                                       |
|                                                                                          | Asian Men                                       | 1.06, 0.88-1.28                                  | 1.02, 0.85-1.23                          | 1.06, 0.89-1.26                    | 0.98, 0.83-1.16                         | 1.15, 0.95-1.40                                  | 1.13, 0.93-1.36                                       |
|                                                                                          | Asian Women                                     | 0.92, 0.77-1.11                                  | 0.89, 0.74-1.07                          | 0.83, 0.70-0.97                    | 0.78, 0.65-0.90                         | 0.95, 0.80-1.13                                  | 0.93, 0.78-1.11                                       |
| <i>Total out-of-pocket medication costs to patient within the 30 days post-discharge</i> | Other Men                                       | 1.10, 0.87-1.39                                  | 1.09, 0.86-1.37                          | 0.86, 0.70-1.06                    | 0.83, 0.68-1.02                         | 1.08, 0.86-1.36                                  | 1.07, 0.85-1.34                                       |
|                                                                                          | Other Women                                     | 0.85, 0.65-1.11                                  | 0.84, 0.64-1.09                          | 0.76, 0.60-0.95                    | 0.73, 0.58-0.91                         | 0.74, 0.58-0.95                                  | 0.74, 0.57-0.94                                       |
|                                                                                          | White Women                                     | 0.91, 0.87-0.95                                  | 0.90, 0.86-0.94                          | 0.90, 0.86-0.93                    | 0.88, 0.85-0.92                         | 1.05, 1.01-1.09                                  | 1.05, 1.00-1.09                                       |
|                                                                                          | Black Men                                       | 0.88, 0.81-0.96                                  | 0.88, 0.81-0.95                          | 0.74, 0.69-0.79                    | 0.73, 0.68-0.78                         | 0.73, 0.67-0.79                                  | 0.70, 0.65-0.76                                       |
|                                                                                          | Black Women                                     | 0.70, 0.62-0.78                                  | 0.69, 0.62-0.78                          | 0.64, 0.58-0.71                    | 0.63, 0.57-0.70                         | 0.72, 0.65-0.81                                  | 0.71, 0.63-0.79                                       |
|                                                                                          | Hispanic Men                                    | 0.95, 0.82-1.11                                  | 0.94, 0.81-1.09                          | 0.81, 0.71-0.92                    | 0.79, 0.69-0.89                         | 0.77, 0.66-0.89                                  | 0.74, 0.65-0.86                                       |
|                                                                                          | Hispanic Women                                  | 0.85, 0.72-1.00                                  | 0.84, 0.72-0.99                          | 0.70, 0.60-0.80                    | 0.68, 0.59-0.78                         | 0.71, 0.61-0.83                                  | 0.69, 0.59-0.81                                       |
|                                                                                          | Asian Men                                       | 1.06, 0.88-1.28                                  | 1.05, 0.87-1.23                          | 1.06, 0.89-1.26                    | 1.00, 0.85-1.19                         | 1.15, 0.95-1.40                                  | 1.13, 0.93-1.36                                       |
| Asian Women                                                                              | 0.92, 0.77-1.11                                 | 0.91, 0.75-1.09                                  | 0.83, 0.70-0.97                          | 0.79, 0.69-0.93                    | 0.95, 0.80-1.13                         | 0.93, 0.78-1.11                                  |                                                       |
| Other Men                                                                                | 1.10, 0.87-1.39                                 | 1.11, 0.88-1.40                                  | 0.86, 0.70-1.06                          | 0.85, 0.70-1.05                    | 1.08, 0.86-1.36                         | 1.07, 0.85-1.34                                  |                                                       |
| Other Women                                                                              | 0.85, 0.65-1.11                                 | 0.85, 0.65-1.11                                  | 0.76, 0.60-0.95                          | 0.74, 0.59-0.93                    | 0.74, 0.58-0.95                         | 0.74, 0.57-0.94                                  |                                                       |

<sup>§</sup>Adjusted for all the measured demographic, clinical and baseline characteristics listed in Table 1

Abbreviations: AMI, Acute Myocardial Infarction; ACEI, Angiotensin Converting Enzyme Inhibitor; ARB, Angiotensin Receptor Blocker; PCP, Primary Care Physician
